# Supplementary material for: First synthesis and aggregation behaviour of periconjugated triazoliumfullerene
Source: Royal Society of Chemistry journal article supplement (doi:10.1039/c3cc45783d), 2013-10-22
Supplement: c3cc45783d.pdf [file c3cc45783d.pdf]

Supporting Information for

## First Synthesis and Aggregation Behaviour of Periconjugated Triazoliumfullerene

Naohiko Ikuma,\* Saori Inaba, Ken Kokubo and Takumi Oshima

### Synthesis of 1,3-diphenylfullerotriazolium hexafluorophosphate ( $3^+ \cdot \text{PF}_6^-$ ):

To a solution of 1,3-diphenyltriazene (12mg, 0.06 mmol),  $\text{C}_{60}$  (36 mg, 0.05 mmol) and potassium hexafluorophosphate (14 mg, 0.08 mmol) in dry  $\text{CH}_2\text{Cl}_2$ /Toluene (15 mL/35mL) under  $\text{N}_2$  atmosphere, *tert*-butyl hypochlorite (65 mg, 0.6 mmol) was dropwisely added at  $-78^\circ\text{C}$ . The solution maintained stirring 16h with gradually increasing temperature to rt. Solvent was removed in vacuo, and the residue was washed with ether, toluene (twice), and small amount of methanol to remove unreacted  $\text{C}_{60}$  and  $\text{KPF}_6$  byproduct. The residue was dried in vacuo, to give  $3^+ \cdot \text{PF}_6^-$  as dark brown powder (27mg, 50%).  $^1\text{H-NMR}$  (270 MHz,  $\text{DMSO-d}_6$ )  $\delta$  8.45 (m, 4H), 7.86 (m, 6H).  $^{13}\text{C-NMR}$  (67.8 MHz,  $\text{DMSO-d}_6$ ):  $\delta$  147.4, 146.3, 146.2, 145.7, 144.9, 144.6, 143.6, 142.6, 142.0, 141.8, 140.9, 140.1, 138.6, 136.1, 134.3, 132.8, 130.7, 128.9, 128.2, 127.2. MALDI-TOF-MS, positive  $m/z = 916.1 [3^+]$ .

### Synthesis of N,N-dimethylpyrrolidiniumfullerene iodide

For the reference compound of typical ionic fullerene in CV measurement, N,N-dimethylpyrrolidiniumfullerene iodide was prepared from the similar method as shown in ref.1b.

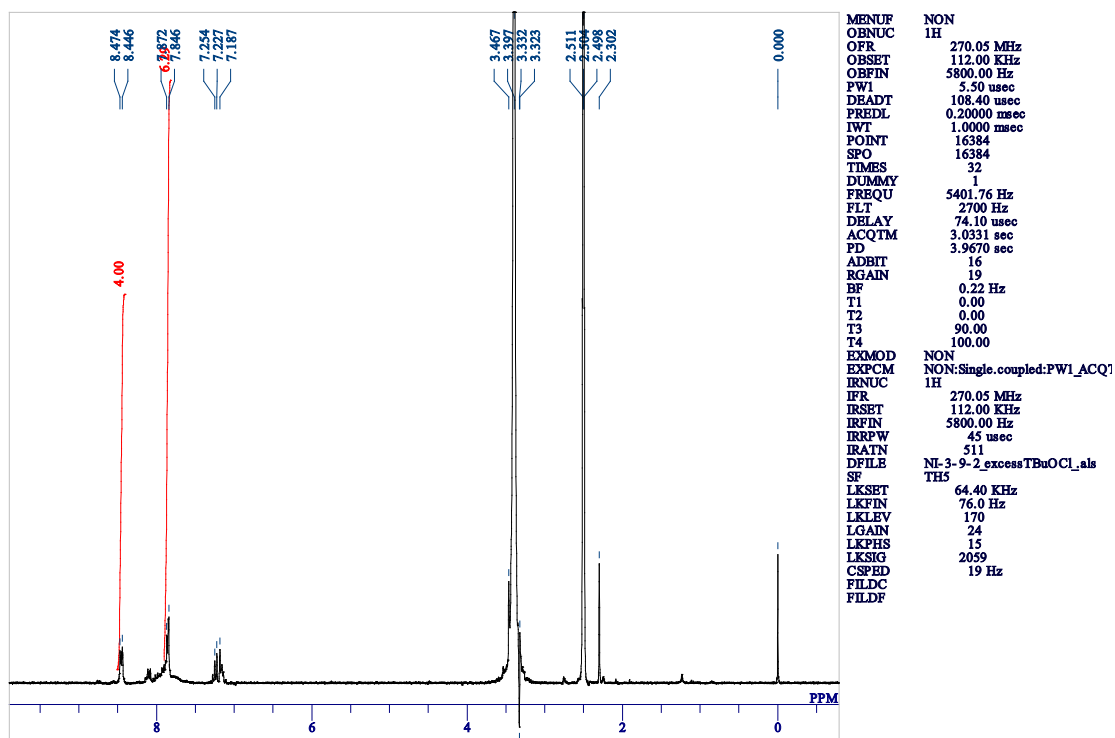

Figure S1.  $^1\text{H}$  and  $^{13}\text{C}$  NMR charts of  $3^+\cdot\text{PF}_6^-$  in DMSO- $d_6$  (with small contamination of toluene in  $^1\text{H}$  NMR).

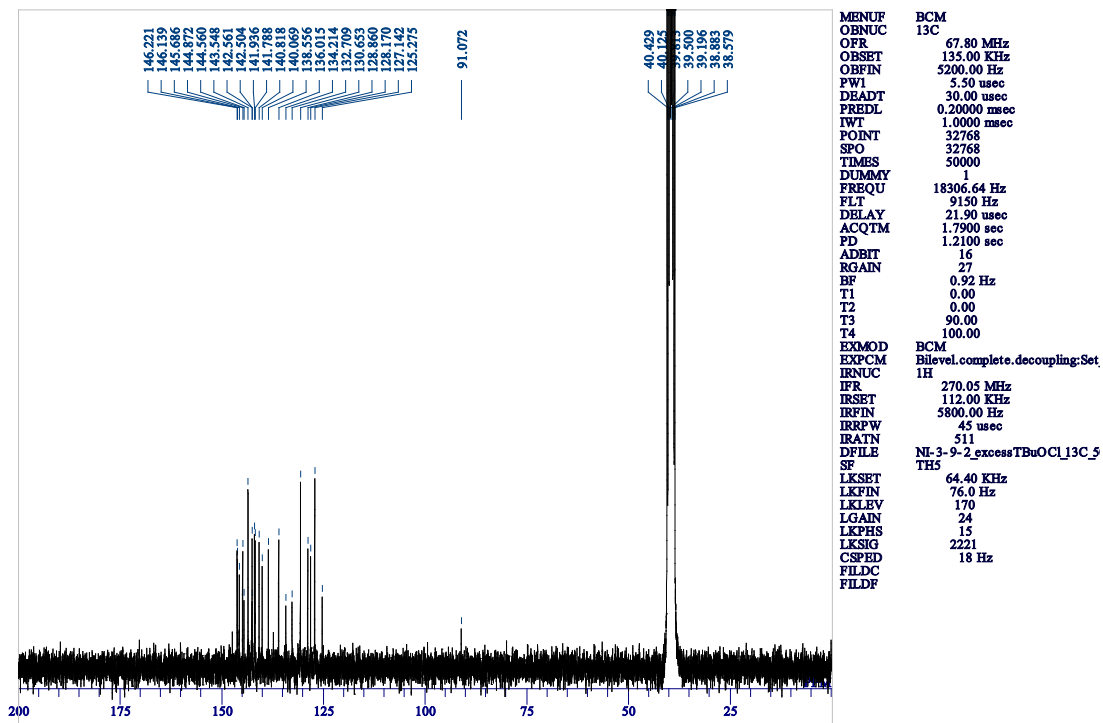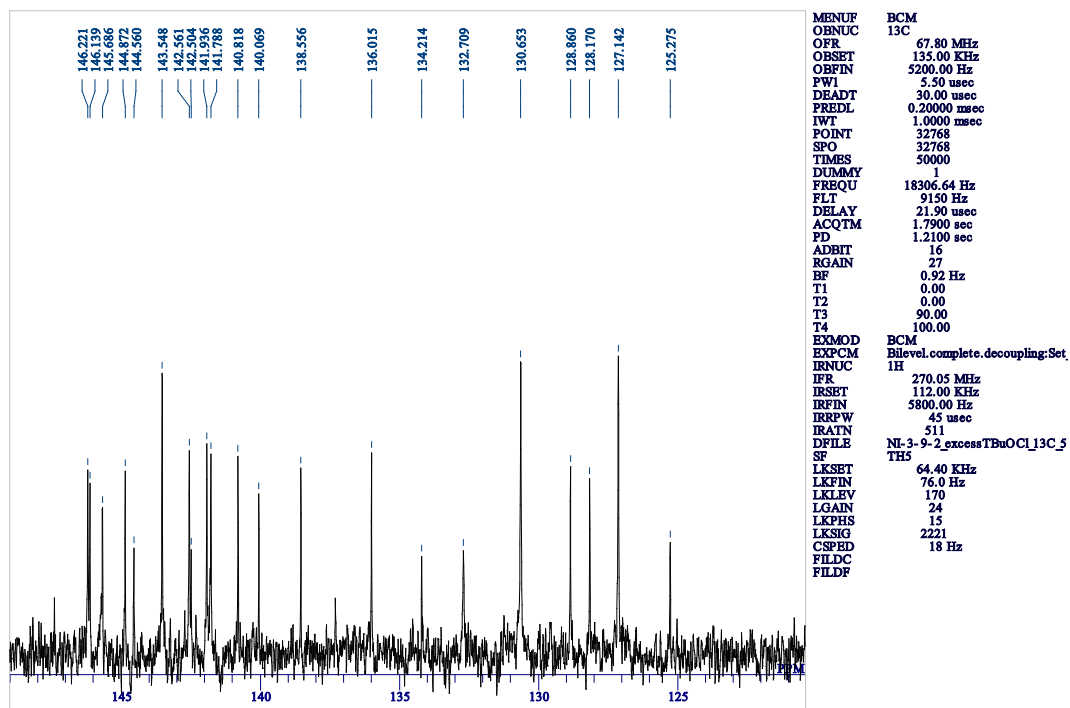

Figure S1 (continued)

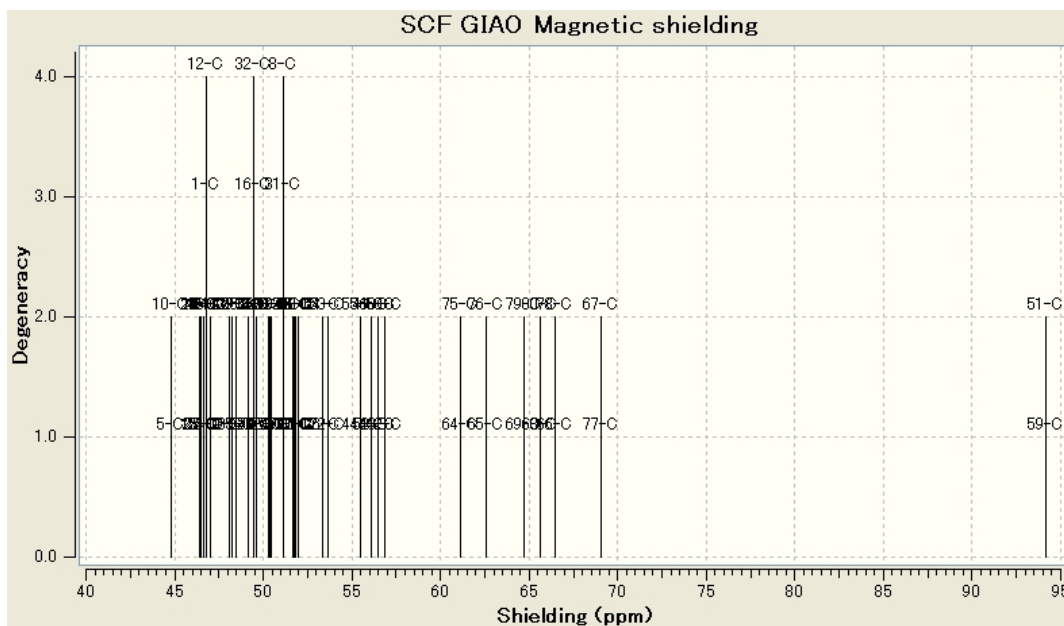

Fig. S2. <sup>13</sup>C NMR simulation of **3**<sup>+</sup> by GIAO/B3LYP/6-31G(d,p) in DMSO (IEFPCM). TMS is 190.17 ppm by the same method, then the relative shielding of two sp<sup>3</sup> carbons (59C and 51C) is 96.0 ppm.

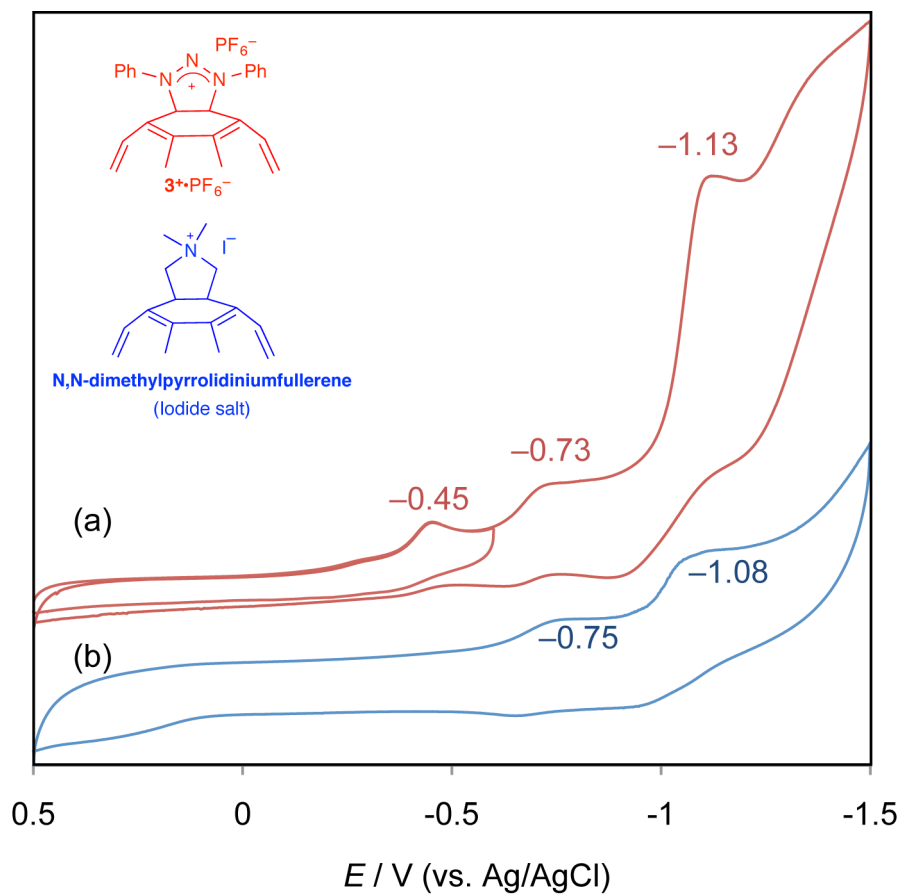

Fig. S3. CV curves and  $E_p$  values for (a)  $3^+\cdot\text{PF}_6^-$  and (b) N,N-dimethylpyrrolidiniumfullerene iodide (0.1 mM PhCN solution, with 0.1 M  $n\text{Bu}_4\text{PF}_6$  electrolyte).

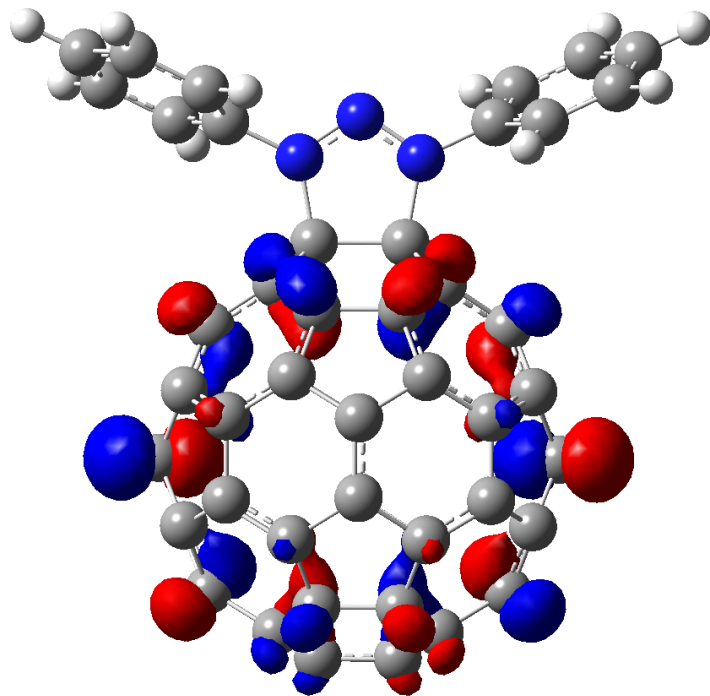

Fig. S4. HOMO orbital of  $3^+$  (BHandHLYP/6-31G(d), IEFPCM=toluene)

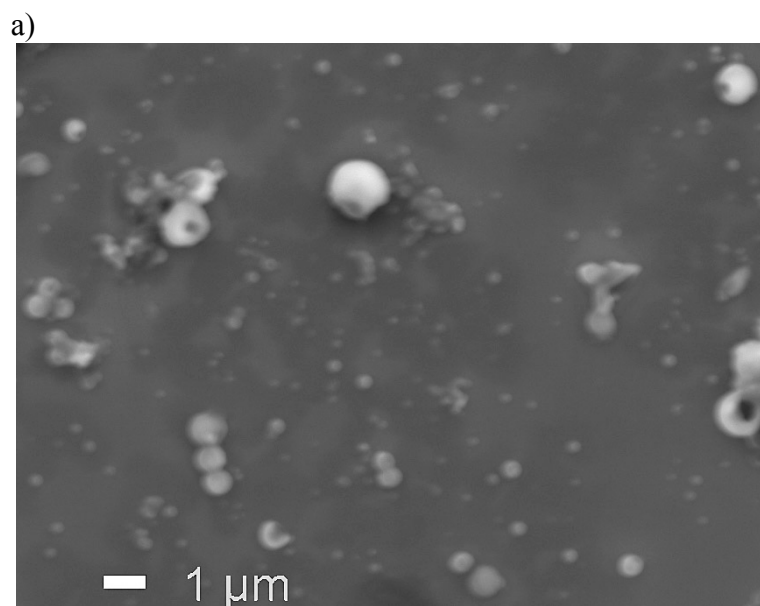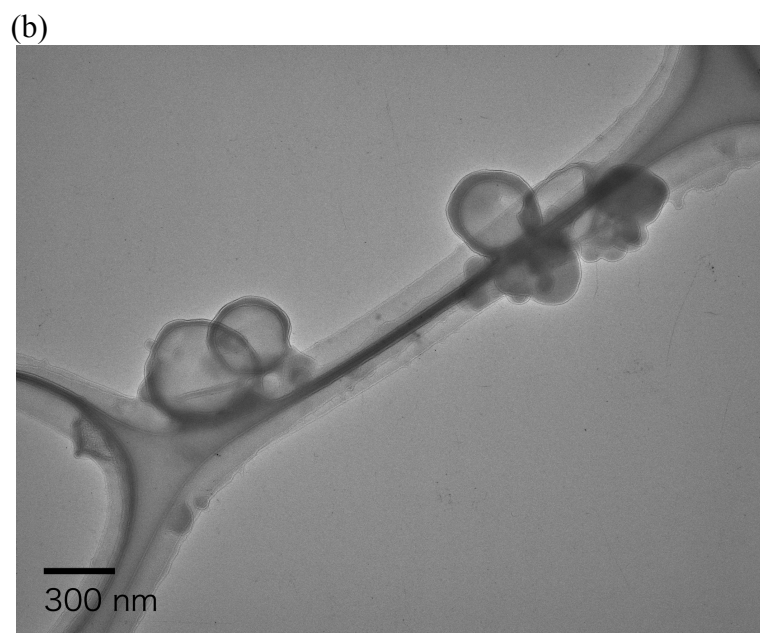

Fig. S5. (a) SEM image (magnified) from THF solution and (b) TEM image (magnified) from MEOH solution

**Full Citation of Spartan'08:**

J. Kong, C. A. White, A. I. Krylov, D. Sherrill, R. D. Adamson, T. R. Furlani, M. S. Lee, A. M. Lee, S. R. Gwaltney, T. R. Adams, C. Ochsenfeld, A. T. B. Gilbert, G. S. Kedziora, V. A. Rassolov, D. R. Maurice, N. Nair, Y. H. Shao, N. A. Besley, P. E. Maslen, J. P. Dombroski, H. Daschel, W. M. Zhang, P. P. Korambath, J. Baker, E. F. C. Byrd, T. Van Voorhis, M. Oumi, S. Hirata, C. P. Hsu, N. Ishikawa, J. Florian, A. Warshel, B. G. Johnson, P. M. W. Gill, M. Head-Gordon and J. A. Pople, *J. Comput. Chem.*, 2000, **21**, 1532.

**Full Citation of Gaussian 09:**

M. J. Frisch, G. W. Trucks, H. B. Schlegel, G. E. Scuseria, M. A. Robb, J. R. Cheeseman, G. Scalmani, V. Barone, B. Mennucci, G. A. Petersson, H. Nakatsuji, M. Caricato, X. Li, H. P. Hratchian, A. F. Izmaylov, J. Bloino, G. Zheng, J. L. Sonnenberg, M. Hada, M. Ehara, K. Toyota, R. Fukuda, J. Hasegawa, M. Ishida, T. Nakajima, Y. Honda, O. Kitao, H. Nakai, T. Vreven, J. A. Montgomery, Jr., J. E. Peralta, F. Ogliaro, M. Bearpark, J. J. Heyd, E. Brothers, K. N. Kudin, V. N. Staroverov, R. Kobayashi, J. Normand, K. Raghavachari, A. Rendell, J. C. Burant, S. S. Iyengar, J. Tomasi, M. Cossi, N. Rega, J. M. Millam, M. Klene, J. E. Knox, J. B. Cross, V. Bakken, C. Adamo, J. Jaramillo, R. Gomperts, R. E. Stratmann, O. Yazyev, A. J. Austin, R. Cammi, C. Pomelli, J. W. Ochterski, R. L. Martin, K. Morokuma, V. G. Zakrzewski, G. A. Voth, P. Salvador, J. J. Dannenberg, S. Dapprich, A. D. Daniels, Ö. Farkas, J. B. Foresman, J. V. Ortiz, J. Cioslowski, and D. J. Fox, Gaussian, Inc., Wallingford CT, 2009.



### Coordinates of the transition state geometry and the vibration mode of imaginary frequency

#### Coordinates of TS

|    |   |        |        |        |    |   |        |        |        |
|----|---|--------|--------|--------|----|---|--------|--------|--------|
| 1  | C | -4.551 | -1.690 | -0.743 | 41 | C | 1.024  | -0.084 | 2.393  |
| 2  | C | -3.828 | -2.694 | 0.001  | 42 | C | 1.456  | -1.048 | 1.511  |
| 3  | C | -3.830 | -2.306 | 1.393  | 43 | C | 1.465  | -1.679 | -0.743 |
| 4  | C | -4.554 | -1.062 | 1.507  | 44 | C | 1.029  | -1.309 | -1.996 |
| 5  | C | -5.000 | -0.681 | 0.187  | 45 | C | -0.139 | 0.318  | -3.206 |
| 6  | C | -4.129 | -0.095 | 2.397  | 46 | C | -0.835 | 1.507  | -3.097 |
| 7  | C | -2.714 | -2.530 | 2.174  | 47 | C | -1.564 | 3.141  | -1.594 |
| 8  | C | -2.710 | -3.290 | -0.548 | 48 | C | -1.564 | 3.511  | -0.264 |
| 9  | C | -4.124 | -1.325 | -2.004 | 49 | C | -0.839 | 2.894  | 1.869  |
| 10 | C | -5.004 | 0.649  | -0.185 | 50 | C | -0.144 | 1.935  | 2.581  |
| 11 | C | -4.133 | 1.297  | 2.008  | 51 | C | 1.944  | -0.675 | 0.193  |
| 12 | C | -4.562 | 1.660  | 0.746  | 52 | C | 1.024  | 0.090  | -2.388 |
| 13 | C | -4.129 | 0.067  | -2.394 | 53 | C | -0.393 | 2.518  | -2.169 |
| 14 | C | -4.560 | 1.032  | -1.504 | 54 | C | -0.395 | 3.278  | 0.552  |
| 15 | C | -2.954 | -1.945 | -2.577 | 55 | C | 1.020  | 1.315  | 2.001  |
| 16 | C | -2.263 | -2.907 | -1.867 | 56 | C | 0.725  | 2.295  | -1.388 |
| 17 | C | -1.542 | -3.522 | 0.268  | 57 | C | 0.725  | 2.684  | 0.004  |
| 18 | C | -1.544 | -3.151 | 1.598  | 58 | C | 1.450  | 1.056  | -1.506 |
| 19 | C | -2.961 | -0.327 | 3.211  | 59 | C | 1.939  | 0.687  | -0.188 |
| 20 | C | -2.270 | -1.518 | 3.104  | 60 | C | 1.454  | 1.688  | 0.748  |
| 21 | C | -0.826 | -1.513 | 3.102  | 61 | N | 4.296  | 1.043  | -0.435 |
| 22 | C | -0.378 | -2.521 | 2.173  | 62 | N | 4.805  | 0.015  | 0.003  |
| 23 | C | -2.962 | 0.308  | -3.207 | 63 | N | 4.303  | -1.016 | 0.441  |
| 24 | C | -2.234 | -0.936 | -3.322 | 64 | C | 4.875  | 2.287  | -0.209 |
| 25 | C | -0.819 | -2.900 | -1.865 | 65 | C | 5.877  | 4.824  | 0.157  |
| 26 | C | -0.373 | -3.281 | -0.548 | 66 | C | 5.781  | 2.522  | 0.829  |
| 27 | C | -3.845 | 2.669  | 0.002  | 67 | C | 4.464  | 3.316  | -1.056 |
| 28 | C | -3.844 | 2.281  | -1.389 | 68 | C | 4.972  | 4.586  | -0.868 |
| 29 | C | -2.968 | 1.925  | 2.581  | 69 | C | 6.281  | 3.793  | 1.003  |
| 30 | C | -2.241 | 0.921  | 3.326  | 70 | H | 6.080  | 1.715  | 1.477  |
| 31 | C | -2.731 | 3.272  | 0.552  | 71 | H | 3.764  | 3.103  | -1.845 |
| 32 | C | -2.283 | 2.892  | 1.871  | 72 | H | 4.666  | 5.389  | -1.517 |
| 33 | C | -2.729 | 2.512  | -2.171 | 73 | H | 6.983  | 3.990  | 1.795  |
| 34 | C | -2.278 | 1.503  | -3.100 | 74 | H | 6.272  | 5.815  | 0.302  |
| 35 | C | -0.855 | -0.932 | -3.321 | 75 | C | 4.889  | -2.256 | 0.215  |
| 36 | C | -0.130 | -1.936 | -2.576 | 76 | C | 5.906  | -4.787 | -0.152 |
| 37 | C | 0.742  | -2.680 | 0.002  | 77 | C | 4.485  | -3.287 | 1.062  |
| 38 | C | 0.739  | -2.291 | 1.393  | 78 | C | 5.795  | -2.485 | -0.825 |
| 39 | C | -0.862 | 0.926  | 3.326  | 79 | C | 6.302  | -3.754 | -0.998 |
| 40 | C | -0.138 | -0.319 | 3.211  | 80 | C | 5.000  | -4.555 | 0.873  |

|    |   |       |        |        |
|----|---|-------|--------|--------|
| 81 | H | 3.784 | -3.079 | 1.852  |
| 82 | H | 6.089 | -1.677 | -1.473 |
| 83 | H | 7.005 | -3.946 | -1.791 |
| 84 | H | 4.700 | -5.359 | 1.523  |
| 85 | H | 6.307 | -5.776 | -0.297 |

### Frequency Calculation:

Frequencies -- -102.2798

Red. masses -- 9.1655

Frc consts -- 0.0565

IR Inten -- 354.7922

| Atom | AN | X    | Y    | Z     |
|------|----|------|------|-------|
| 1    | 6  | 0.03 | 0.00 | 0.00  |
| 2    | 6  | 0.03 | 0.00 | 0.00  |
| 3    | 6  | 0.03 | 0.00 | 0.00  |
| 4    | 6  | 0.03 | 0.00 | 0.00  |
| 5    | 6  | 0.04 | 0.00 | 0.00  |
| 6    | 6  | 0.04 | 0.00 | 0.00  |
| 7    | 6  | 0.03 | 0.00 | 0.00  |
| 8    | 6  | 0.03 | 0.00 | 0.00  |
| 9    | 6  | 0.04 | 0.00 | 0.00  |
| 10   | 6  | 0.04 | 0.00 | 0.00  |
| 11   | 6  | 0.04 | 0.00 | 0.00  |
| 12   | 6  | 0.03 | 0.00 | 0.00  |
| 13   | 6  | 0.04 | 0.00 | 0.00  |
| 14   | 6  | 0.03 | 0.00 | 0.00  |
| 15   | 6  | 0.04 | 0.00 | 0.00  |
| 16   | 6  | 0.04 | 0.00 | 0.00  |
| 17   | 6  | 0.03 | 0.00 | 0.00  |
| 18   | 6  | 0.03 | 0.00 | 0.00  |
| 19   | 6  | 0.04 | 0.00 | 0.00  |
| 20   | 6  | 0.04 | 0.00 | 0.00  |
| 21   | 6  | 0.04 | 0.00 | -0.01 |
| 22   | 6  | 0.04 | 0.00 | 0.00  |
| 23   | 6  | 0.04 | 0.00 | 0.00  |
| 24   | 6  | 0.04 | 0.00 | 0.01  |
| 25   | 6  | 0.04 | 0.00 | 0.01  |
| 26   | 6  | 0.04 | 0.00 | 0.00  |
| 27   | 6  | 0.03 | 0.00 | 0.00  |
| 28   | 6  | 0.03 | 0.00 | 0.00  |
| 29   | 6  | 0.04 | 0.00 | 0.00  |
| 30   | 6  | 0.04 | 0.00 | -0.01 |
| 31   | 6  | 0.03 | 0.00 | 0.00  |

|    |   |       |       |       |
|----|---|-------|-------|-------|
| 32 | 6 | 0.04  | 0.00  | 0.00  |
| 33 | 6 | 0.03  | 0.00  | 0.00  |
| 34 | 6 | 0.04  | 0.00  | 0.00  |
| 35 | 6 | 0.04  | 0.00  | 0.01  |
| 36 | 6 | 0.04  | 0.00  | 0.01  |
| 37 | 6 | 0.04  | 0.01  | 0.00  |
| 38 | 6 | 0.04  | 0.01  | 0.00  |
| 39 | 6 | 0.04  | 0.00  | -0.01 |
| 40 | 6 | 0.04  | 0.00  | -0.01 |
| 41 | 6 | 0.04  | -0.01 | -0.01 |
| 42 | 6 | 0.05  | -0.01 | 0.00  |
| 43 | 6 | 0.06  | -0.01 | 0.00  |
| 44 | 6 | 0.04  | 0.00  | 0.01  |
| 45 | 6 | 0.04  | 0.00  | 0.01  |
| 46 | 6 | 0.04  | 0.00  | 0.01  |
| 47 | 6 | 0.03  | 0.00  | 0.00  |
| 48 | 6 | 0.03  | 0.00  | 0.00  |
| 49 | 6 | 0.04  | 0.00  | -0.01 |
| 50 | 6 | 0.04  | 0.00  | -0.01 |
| 51 | 6 | 0.15  | -0.03 | 0.01  |
| 52 | 6 | 0.04  | 0.01  | 0.01  |
| 53 | 6 | 0.04  | 0.00  | 0.00  |
| 54 | 6 | 0.04  | 0.00  | 0.00  |
| 55 | 6 | 0.04  | 0.00  | -0.01 |
| 56 | 6 | 0.04  | -0.01 | 0.00  |
| 57 | 6 | 0.04  | -0.01 | 0.00  |
| 58 | 6 | 0.05  | 0.01  | 0.00  |
| 59 | 6 | 0.15  | 0.03  | -0.01 |
| 60 | 6 | 0.06  | 0.01  | 0.00  |
| 61 | 7 | -0.32 | 0.00  | 0.10  |
| 62 | 7 | -0.16 | 0.00  | 0.00  |
| 63 | 7 | -0.32 | -0.01 | -0.10 |
| 64 | 6 | -0.25 | 0.00  | 0.05  |
| 65 | 6 | -0.01 | -0.06 | -0.05 |
| 66 | 6 | -0.21 | -0.03 | 0.02  |
| 67 | 6 | -0.16 | 0.01  | 0.03  |
| 68 | 6 | -0.04 | -0.02 | -0.02 |
| 69 | 6 | -0.08 | -0.07 | -0.03 |
| 70 | 1 | -0.27 | -0.04 | 0.05  |
| 71 | 1 | -0.18 | 0.05  | 0.03  |
| 72 | 1 | 0.02  | -0.02 | -0.05 |
| 73 | 1 | -0.04 | -0.11 | -0.05 |
| 74 | 1 | 0.08  | -0.09 | -0.09 |
| 75 | 6 | -0.25 | 0.00  | -0.05 |

|    |   |       |       |       |
|----|---|-------|-------|-------|
| 76 | 6 | -0.01 | 0.06  | 0.05  |
| 77 | 6 | -0.16 | -0.01 | -0.03 |
| 78 | 6 | -0.21 | 0.03  | -0.02 |
| 79 | 6 | -0.08 | 0.07  | 0.03  |
| 80 | 6 | -0.04 | 0.02  | 0.02  |
| 81 | 1 | -0.17 | -0.06 | -0.03 |
| 82 | 1 | -0.27 | 0.03  | -0.05 |
| 83 | 1 | -0.05 | 0.11  | 0.05  |
| 84 | 1 | 0.02  | 0.02  | 0.05  |
| 85 | 1 | 0.08  | 0.09  | 0.09  |
